# Supplementary material for: Predictive Value of HAS-BLED Score Regarding Bleeding Events and Graft Survival following Renal Transplantation
Source: MDPI journal article supplement (doi:10.3390/jcm11144025), 2022-07-12

## Supplementary information

**Table S1:** Summary of post-operative drugs/ doses stratified according to prophylaxis and (sub)therapeutic group

| Included postoperative drugs/doses | Prophylaxis group                                                                    | (sub)therapeutic group                                                                 |
|------------------------------------|--------------------------------------------------------------------------------------|----------------------------------------------------------------------------------------|
| Aspirin                            | Not administered                                                                     | 100 mg 1-0-0                                                                           |
| Clopidogrel/Plavix                 | Not administered                                                                     | 75 mg 1-0-0                                                                            |
| Unfractionated Heparin             | 5000 UE s.c. (1-1-1)<br><br><b>Or</b><br><br>200 – 600 IU/h (< 15 IU/kg/h, perfusor) | Perfusor: $\geq 15$ IU/ kg/ h (starting dosage, then PTT controlled, target: 60 – 80s) |
| Low molecular weight heparin       | Tanzaparin (Innohep®): 0.35 ml; 3500 IU s.c. (1-0-0)                                 | Tanzaparin (Innohep®): 175 IU/ kg s.c. (1-0-0)                                         |
|                                    | Nadroparin Fraxaparin®): 0.3ml, 2.850 I.E. 1-0-0                                     | Nadroparin Fraxaparin®): 0.1 mL/10 kgKG s.c. 1-0-1                                     |
| Argatroban (n=2, HIT history)      | 0.1 – 0.24 $\mu$ g/min/kg                                                            | Not administered                                                                       |
| Danaparoid (n=1, HIT-history)      | 1500 Anti-Xa-units (loading dose) s.c.                                               | Not administered                                                                       |

|                                   |                                |                                                                       |
|-----------------------------------|--------------------------------|-----------------------------------------------------------------------|
|                                   | 750 Ant-Xa- units s.c. (1-0-1) |                                                                       |
| Warfarin                          | Not administered               | Not administered postoperative course; see below pre-operative regime |
| Direct oral anticoagulants (DOAC) | Not administered               | Not administered postoperative course; see below pre-operative regime |

**Table S2:** Long-term graft function stratified by antithrombotic medication regime and bleeding episodes

| <b>Variables</b>                           | <b>prophylactic anticoagulation<br/>(n = 108 patients)</b> | <b>(Sub)therapeutic and/or antiplatelet therapy<br/>(n = 96 patients)</b> | <b>p-value</b> | <b>No Bleeding<br/>(n = 143 patients)</b> | <b>Bleeding<br/>(n = 61 patients)</b> | <b>p-value</b> |
|--------------------------------------------|------------------------------------------------------------|---------------------------------------------------------------------------|----------------|-------------------------------------------|---------------------------------------|----------------|
| Mean serum creatinine at 1 month (mmol/l)  | 0.17 ± 0.82                                                | 0.19 +/- 0.13                                                             | 0.213          | 0.18 ± 0.11                               | 0.19 ± 0.12                           | 0.646          |
| Mean GFR at 1 month (ml/min)               | 41 ± 17                                                    | 39 ± 18                                                                   | 0.360          | 41 ± 18                                   | 38 ± 18                               | 0.382          |
| Mean serum urea at 1 month (mmol/l)        | 9.49 ± 4.22                                                | 9.71 ± 4.57                                                               | 0.728          | 9.93 ± 4.41                               | 8.79 ± 4.23                           | 0.098          |
| Mean serum creatinine at 3 months (mmol/l) | 0.16 ± 0.55                                                | 0.19 ± 0.17                                                               | 0.055          | 0.16 ± 0.06                               | 0.19 ± 0.11                           | 0.056          |
| Mean GFR at 3 months (ml/min)              | 42 ± 15                                                    | 39 ± 18                                                                   | 0.168          | 42 ± 16                                   | 37 ± 17                               | 0.059          |
| Mean serum urea at 3 months (mmol/l)       | 9.68 ± 4.74                                                | 10.80 ± 5.93                                                              | 0.162          | 9.84 ± 4.65                               | 11.01 ± 6.62                          | 0.231          |
| Mean serum creatinine at 6 months (mmol/l) | 0.16 ± 0.07                                                | 0.15 ± 0.08                                                               | 0.776          | 0.15 ± 0.07                               | 0.15 ± 0.07                           | 0.937          |
| Mean GFR at 6 months (ml/min)              | 45 ± 16                                                    | 43 ± 18                                                                   | 0.508          | 45 ± 17                                   | 43 ± 16                               | 0.634          |

|                                             |               |              |       |               |              |       |
|---------------------------------------------|---------------|--------------|-------|---------------|--------------|-------|
| Mean serum urea at 6 months (mmol/l)        | 10.03 ± 4.46  | 9.95 ± 4.06  | 0.909 | 10.1 ± 4.49   | 9.74 ± 3.76  | 0.631 |
| Mean serum creatinine at 9 months (mmol/l)  | 0.14 ± 0.04   | 0.17 ± 0.13  | 0.144 | 0.15 ± 0.07   | 0.17 ± 0.14  | 0.300 |
| Mean GFR at 9 months (ml/min)               | 47 ± 18       | 42 ± 18      | 0.175 | 46 ± 19       | 42 ± 17      | 0.302 |
| Mean serum urea at 9 months (mmol/l)        | 9.79 ± 4.51   | 10.95 ± 5.37 | 0.176 | 10.05 ± 4.73  | 10.95 ± 5.41 | 0.331 |
| Mean serum creatinine at 12 months (mmol/l) | 0.15 ± 0.06   | 0.17 ± 0.12  | 0.214 | 0.16 ± 0.08   | 0.17 ± 0.12  | 0.461 |
| Mean GFR at 12 months (ml/min)              | 47 ± 18       | 43 ± 18      | 0.194 | 46 ± 18       | 44 ± 18      | 0.537 |
| Mean serum urea at 12 months (mmol/l)       | 15.36 ± 49.59 | 11.01 ± 6.76 | 0.474 | 14.82 ± 43.94 | 10.04 ± 4.64 | 0.469 |

Data shown as median +/- standard deviation (SD); GFR, glomerular filtration rate;

Inter-group comparison: no bleeding versus bleeding and prophylactic anticoagulation versus (Sub)therapeutic and/or antiplatelet therapy.

**Table S3:** Univariate logistic regression analysis for risk factors for bleeding following kidney transplantation

| Variables                                               | Odds ratio<br>(95% CI) | p-value           |
|---------------------------------------------------------|------------------------|-------------------|
| <b>Recipient characteristics</b>                        |                        |                   |
| Age, years                                              | 1.06 (0.98-1.02)       | 0.598             |
| Gender (female versus male)                             | 1.38 (0.75-2.55)       | 0.301             |
| BMI (per 5 kg/m <sup>2</sup> increase)                  | 0.49 (0.21-0.99)       | <b>&lt;0.05*</b>  |
| BMI > 30 kg/m <sup>2</sup>                              | 0.38 (0.15-0.95)       | <b>&lt; 0.05*</b> |
| Time on dialysis pretransplant<br>(per 1 year increase) | 1.13 (1.06-1.22)       | <b>&lt; 0.05*</b> |
| Type of dialysis (Hemodialysis<br>versus CAPD)          | 0.44 (0.03-7.16)       | 0.564             |
| Diabetes mellitus (yes versus<br>no)                    | 0.87 (0.76-2.3)        | 0.245             |
| Peripheral arterial disease (yes<br>versus no)          | 1.55 (0.76-4.23)       | 0.110             |
| Cardiovascular disease (yes<br>versus no)               | 2.57 (1.39-4.75)       | <b>&lt;0.01**</b> |
| HAS-BLED Score                                          | 1.67 (1.23-2.23)       | <b>&lt;0.01**</b> |

|                                            |                  |                     |
|--------------------------------------------|------------------|---------------------|
| ASA score, per 1 point increase            | 2.21 (1.04-4.89) | <b>&lt; 0.01**</b>  |
| <b>Donor characteristics</b>               |                  |                     |
| Age, > 55 years                            | 1.97 (1.07-3.62) | <b>&lt; 0.05*</b>   |
| Gender (female versus male)                | 1.61 (0.62-1.91) | 0.521               |
| BMI (per 5 kg/m2 increase)                 | 1.45 (0.71-3.67) | 0.189               |
| Type (living versus deceased)              | 0.41 (0.18-0.92) | <b>&lt; 0.05*</b>   |
| Donation of the kidney (right versus left) | 0.19 (0.16-2.17) | 0.181               |
| <b>Transplant characteristics</b>          |                  |                     |
| Blood loss, ml                             | 1.01 (1.01-1.03) | <b>&lt; 0.05*</b>   |
| Re-transplantation (yes versus no)         | 1.07 (0.35-3.2)  | 0.902               |
| Number of arteries (>1 versus 1)           | 1.36 (0.54-3.45) | 0.506               |
| Cold ischemia time (hours)                 | 1.05 (1.00-1.13) | 0.07                |
| Anastomosis time > 45min                   | 0.38 (0.20-0.73) | <b>&lt;0.01**</b>   |
| Duration of surgery, hours                 | 1.09 (1.00-1.02) | <b>&lt; 0.01 **</b> |

|                                                       |                   |                    |
|-------------------------------------------------------|-------------------|--------------------|
| Postoperative diuresis at 1 hour, ml                  | 0.99 (0.99-1.00)  | 0.081              |
| ABO- incompatible KT (yes versus no)                  | 1.05 (0.37-2.90)  | 0.927              |
| Delayed Graft function (yes versus no)                | 2.74 (1.45-5.08)  | <b>&lt; 0.01**</b> |
| Rejection Episodes (yes versus no)                    | 6.81 (2.04-22.46) | <b>&lt; 0.01**</b> |
| Infectious complications                              | 6.9 (2.67-17.82)  | <b>&lt; 0.01**</b> |
| Clavien-Dindo Classification > Grade II               | 8.62 (4.05-18.4)  | <b>&lt; 0.01**</b> |
| <b>Pharmacological and laboratory characteristics</b> |                   |                    |
| Induction Therapy (yes versus no)                     | 1.21 (0.62-2.37)  | 0.580              |
| Initial immunosuppression (CNI versus mTOR)           | 0.7 (0.37-1.58)   | 0.120              |
| Preoperative analgetics                               | 1.55 (0.9-2.67)   | 0.07               |
| Postoperative analgetics                              | 1.23 (0.75-2.1)   | 0.09               |
| CMV prophylaxis                                       | 1.85 (0.98-3.49)  | 0.06               |
| Initial platelets (every 10 unit increased)           | 0.97 (0.93-1.02)  | 0.286              |

|                                                                                                                                                                                             |                                                                              |                                                        |
|---------------------------------------------------------------------------------------------------------------------------------------------------------------------------------------------|------------------------------------------------------------------------------|--------------------------------------------------------|
| Preoperative Anticoagulation<br>(yes versus no, not stopped, INR not corrected)                                                                                                             | 6.25 (1.18-33.39)                                                            | <b>&lt; 0.05*</b>                                      |
| Preoperative antiplatelets (yes versus no)                                                                                                                                                  | 1.57 (0.82-2.81)                                                             | 0.186                                                  |
| Intraoperative heparin                                                                                                                                                                      | 2.25 (0.82-6.13)                                                             | 0.102                                                  |
| Postoperative antithrombotic regime ((sub) therapeutically versus prophylactic)                                                                                                             | 2.95 (1.58-5.53)                                                             | <b>&lt; 0.01**</b>                                     |
| <i>Postoperative antithrombotic regime</i><br><br>Prophylaxis<br><br>Platelet + Prophylactic heparin<br><br>Platelet + Therapeutical Heparin<br><br>Postoperative Heparin (therapeutically) | 1.0<br><br>1.97 (0.93-4.18)<br><br>9.24 (2.67-33.85)<br><br>3.95 (1.95-8.02) | 0.08<br><br><b>&lt;0.01**</b><br><br><b>&lt;0.01**</b> |
| Catecholamine use                                                                                                                                                                           | 8.12 (2.9-21.9)                                                              | <b>&lt; 0.01**</b>                                     |
| Start anticoagulation, hours                                                                                                                                                                | 0.9 (0.81-0.99)                                                              | <b>&lt; 0.05*</b>                                      |
| Start anticoagulation, <6 versus > 6hours                                                                                                                                                   | 0.54 (0.29-0.99)                                                             | <b>&lt; 0.05*</b>                                      |



|                                                  |                   |                    |
|--------------------------------------------------|-------------------|--------------------|
| Antiplatelet therapy <24 hours versus > 24 hours | 2.15 (1.03-4.39)  | <b>&lt; 0.05*</b>  |
| Maximum PTT-value, at day 1                      | 1.03 (1.01-1.06)  | <b>&lt; 0.01**</b> |
| Maximum platelets, at day 1                      | 0.994 (0.98-0.99) | <b>&lt; 0.05*</b>  |
| Maximum platelets, at day 3                      | 0.94 (0.98-0.99)  | <b>&lt; 0.05*</b>  |
| Maximum PTT-value, at day 5                      | 1.03 (1.00-1.05)  | <b>&lt; 0.05*</b>  |
| Maximum platelets, at day 5                      | 0.99 (0.98-0.99)  | <b>&lt; 0.01**</b> |

The following clinical, paraclinical and pharmacological variables were tested in univariate analysis but failed to show any significance for allograft failure: *(Para)clinical factors*: antihypertensive medications (0-2 versus > 2); statins, thyroid and parathyroid medication, diuretics, gastric inhibitors, bone protection/ calcium homeostasis and Vitamin D- metabolism; hormones (iron medications, erythropoietin), phosphate binder, bicarbonate. *Postoperative/follow-up*: antihypertensive medications (0-2 versus > 2); statins, thyroid and parathyroid medication, diuretics, analgetics, antidiabetic medications, gastric inhibitors, bone protection/ calcium homeostasis and Vitamin D- metabolism; hormones (iron medications, erythropoietin), phosphate binder, bicarbonate, CMV prophylaxis and CMV therapy, PCP prophylaxis therapy.

95% CI, 95% confidence interval; NS, not significant; BMI, body mass index; ASA, American society of Anesthesiologists; CNI, calcineurin inhibitors; mTOR, mechanistic target of rapamycin; INR, international normalized ratio; KT, kidney transplantation; CMV, cytomegalovirus; PCP, pneumocystis carinii; IS, immunosuppression; PTT, partial thromboplastin time;  $p < 0.05$  \*;  $p < 0.01$  \*\*;

**Figure S1:** Receiver operating characteristics (ROC) curve of HAS-BLED risk score for bleeding events in patients undergoing kidney transplantation

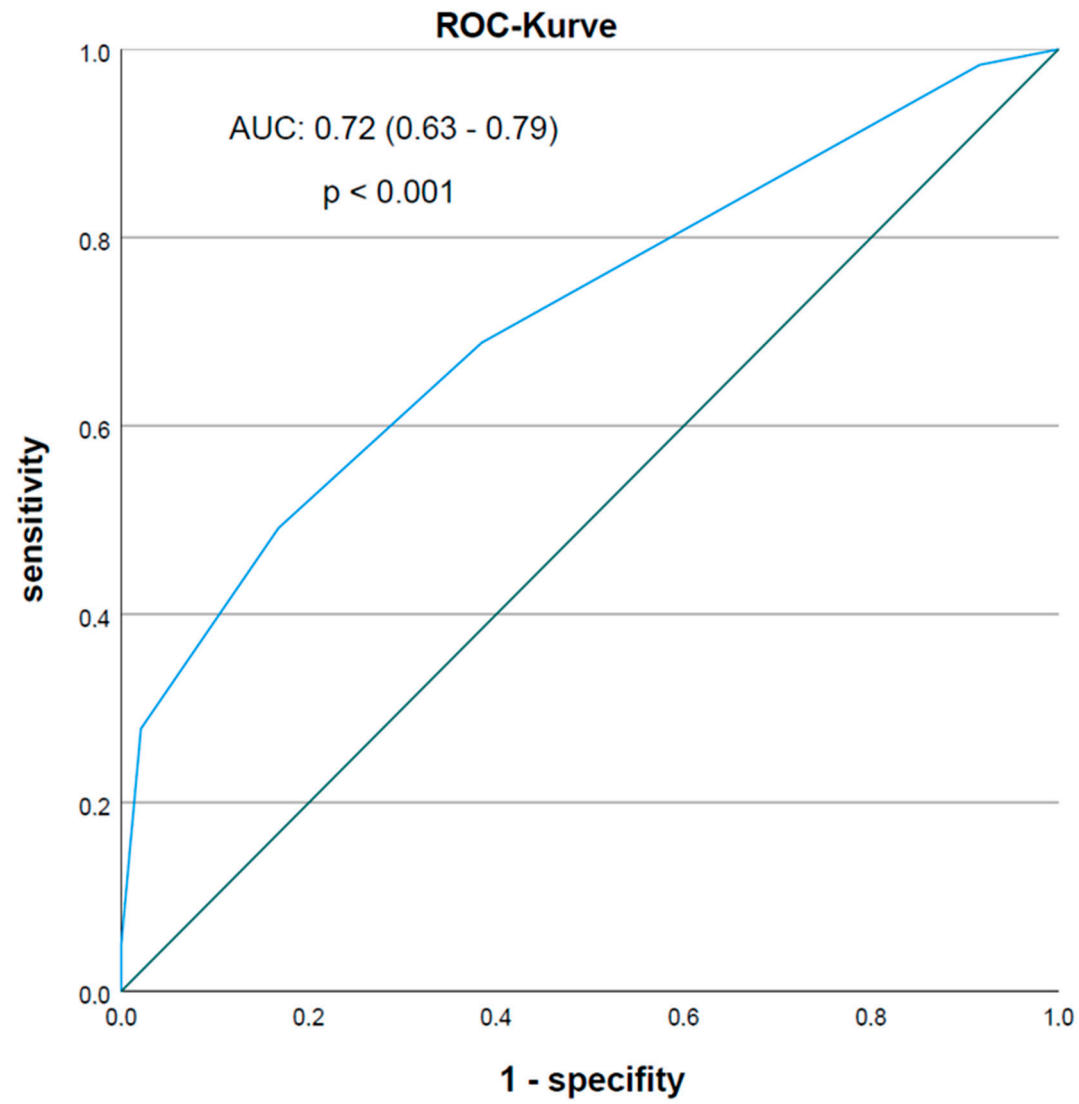

**Figure S2:** Kidney transplant outcome stratified by bleeding management

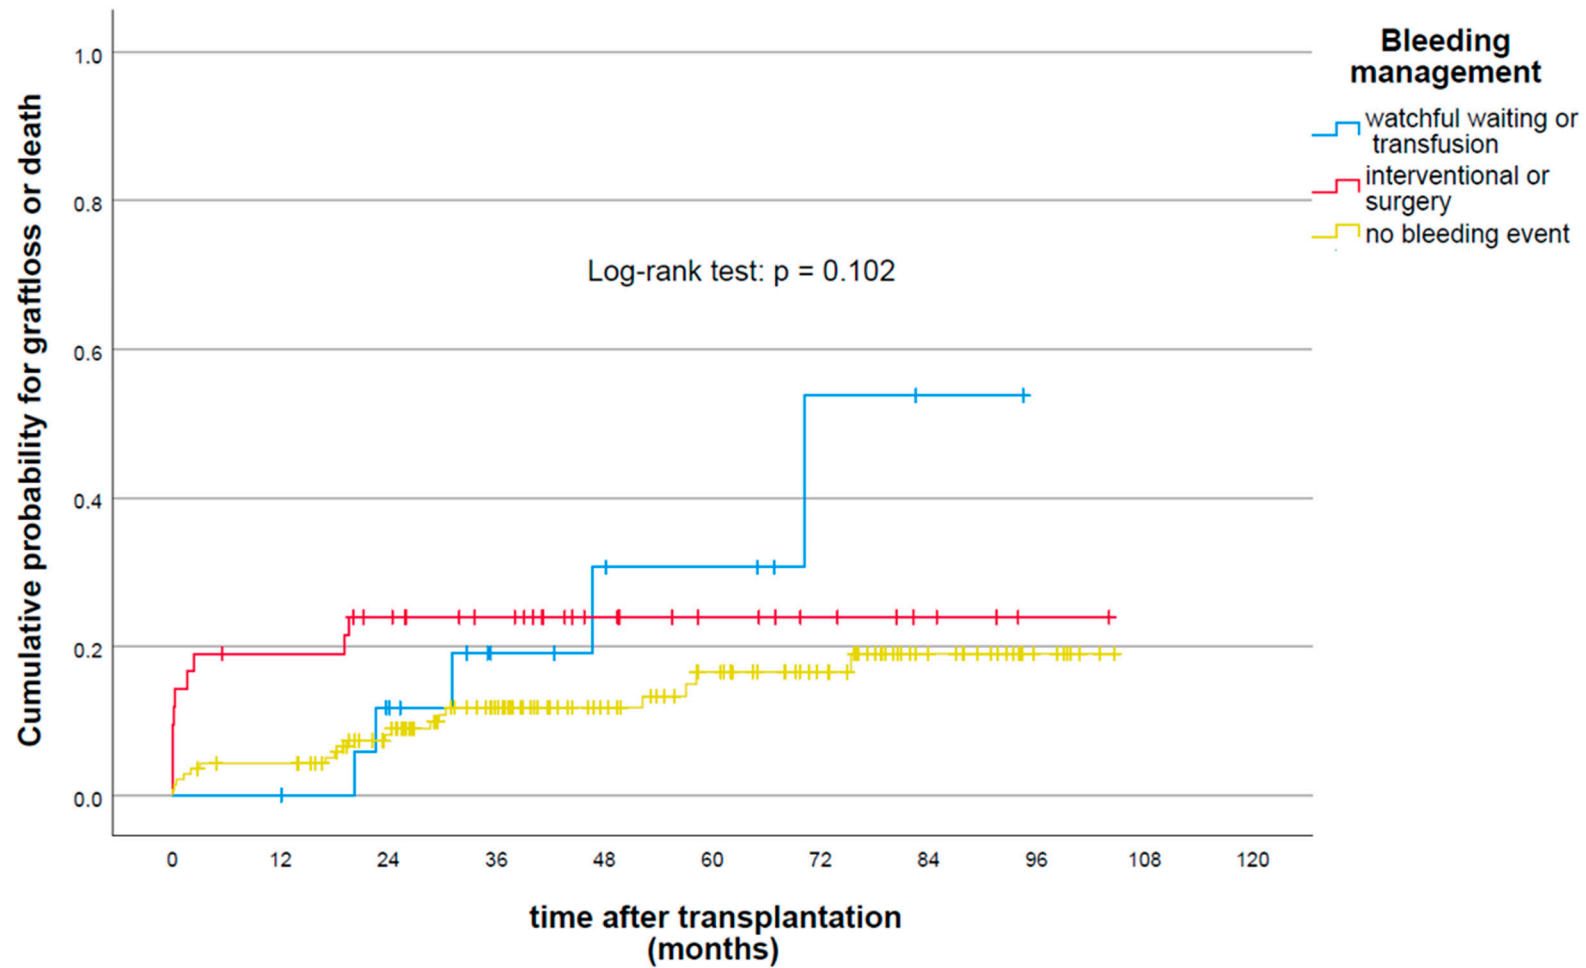

**Figure S3:** Transplant outcome according to bleeding status and donor type

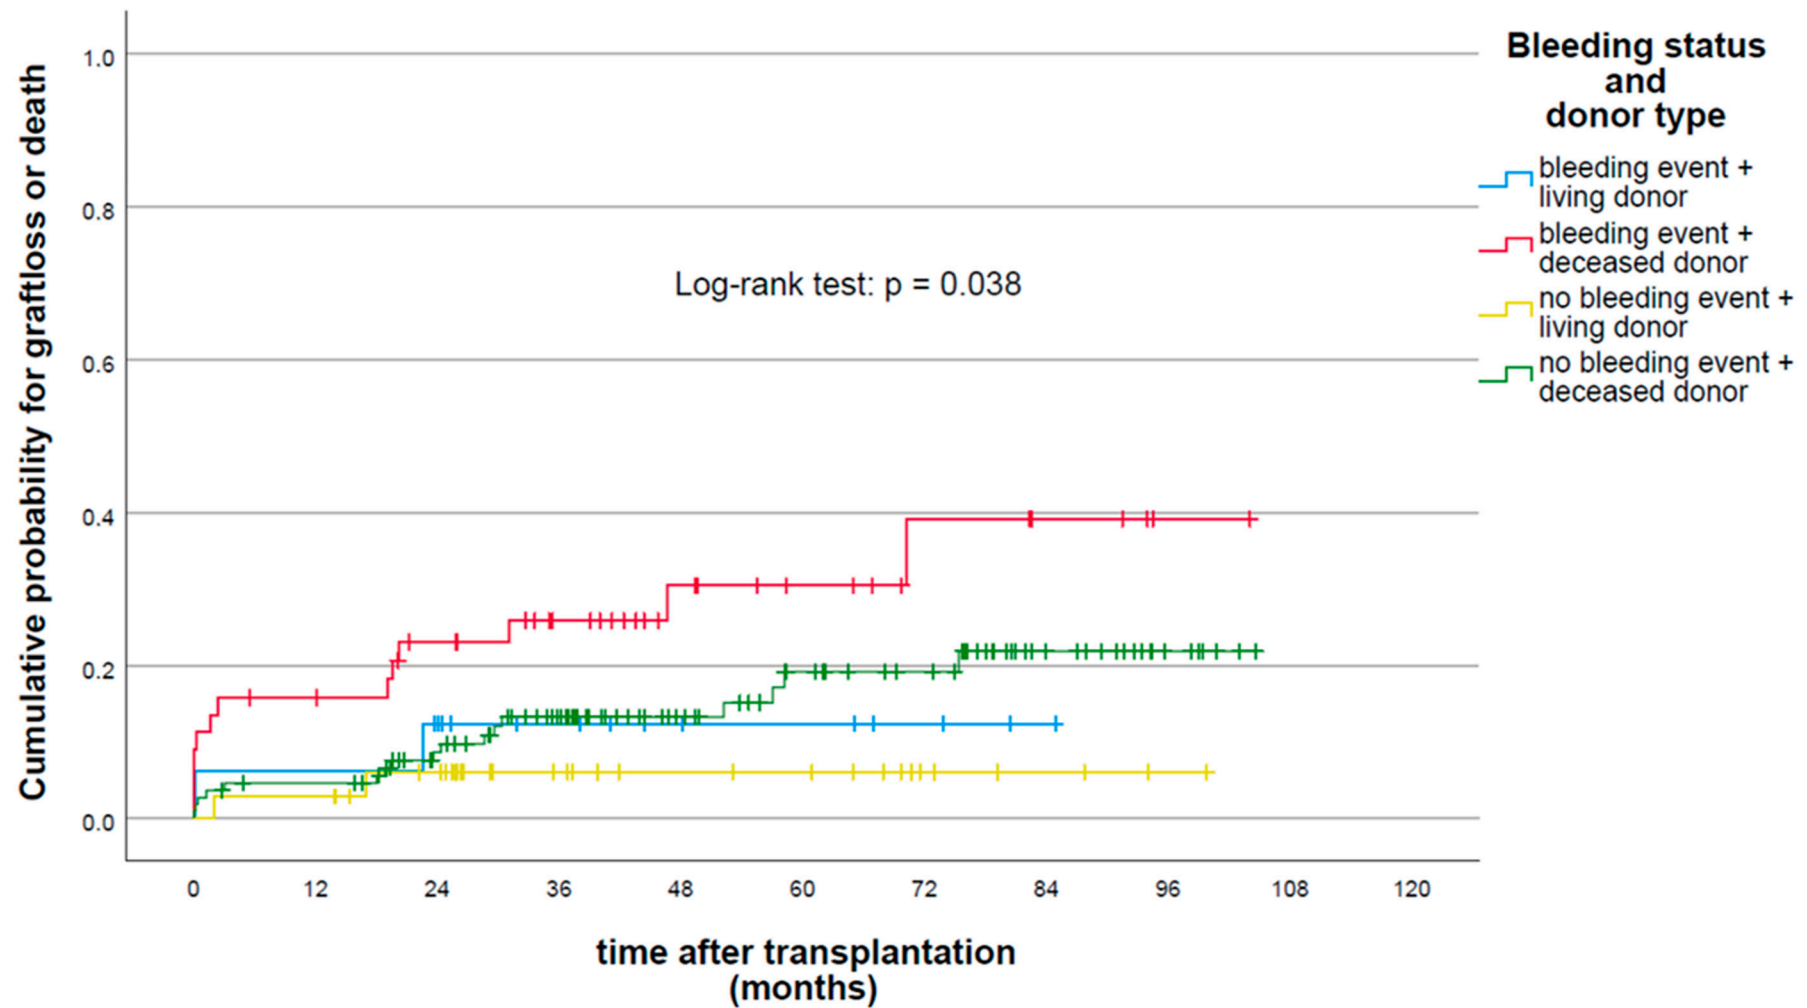

Supplement: s1 [file s1]
